# Supplementary material for: Comparison of the da Vinci Xi and hinotori surgical robotic systems using a training model: an ex vivo study
Source: Research Square preprint supplement (doi:10.21203/rs.3.rs-8313500/v1), 2025-12-15
Supplement: Supplementary file 1 [file 525d7c93581b09493304d4bd.xlsx]

## Sheet: Sheet1
Table 2. Comparison of NASA-Task Load index (TLX) of task 1 between hinotori and daVinci Xi in (a) overall participants, (b) attending surgeons and (c) residents.
(a)
	hinotori	da Vinci Xi without finger clutch	da Vinci Xi with finger clutch	P value (overall)	P value (hinotori vs da Vinci Xi without finger clutch)	P value (hinotori vs da Vinci Xi with finger clutch)	P value (da Vinci Xi without finger clutch vs da Vinci Xi wth finger clutch)
Mental demand	4.7 (0.0-26.7)	9.3 (0.0-30.0)	10.8 (0.0-26.7)	0.79	0.86	0.83	0.98
Physical demand	15.0 (0.0-26.7)	9.0 (0.0-23.3)	5.0 (0.0-18.3)	0.12	0.62	0.17	0.30
Temporal demand	4.5 (0.0-26.7)	3.0 (0.0-20.0)	4.3 (0.0-20.0)	0.95	0.99	0.97	0.96
Performance	10.7 (2.3-25.0)	8.7 (0.0-23.3)	8.2 (1.7-28.3)	0.73	0.79	0.77	0.99
Effort	6.8 (0.0-25.0)	5.5 (0.0-20.0)	4.3 (2.0-17.3)	0.76	0.96	0.98	0.67
Frustration	15.5 (5.0-33.3)	7.2 (0.0-25.0)	4.8 (0.0-20.0)	<0.01	0.01	<0.01	0.59
TLX overall	68.7 (46.0-90.7)	62.7 (26.7-77.3)	46.2 (26.7-72.0)	<0.01	0.13	<0.01	0.48
(b)
	hinotori	da Vinci Xi without finger clutch	da Vinci Xi with finger clutch	P value (overall)	P value (hinotori vs da Vinci Xi without finger clutch)	P value (hinotori vs da Vinci Xi with finger clutch)	P value (da Vinci Xi without finger clutch vs da Vinci Xi wth finger clutch)
Mental demand	3.5 (0.0-18.0)	0.0 (0.0-21.7)	0.0 (0.0-23.3)	0.94	0.97	0.97	0.99
Physical demand	8.2 (0.0-21.7)	6.5 (0.7-20.0)	3.5 (1.7-18.3)	0.85	0.98	0.94	0.85
Temporal demand	17.0 (0.0-26.7)	8.0 (2.7-20.0)	11.0 (1.7-20.0)	0.29	0.41	0.38	0.99
Performance	11.3 (3.0-21.7)	11.3 (4.0-23.3)	10.7 (3.3-28.3)	0.98	0.99	1.00	0.99
Effort	2.2 (0.0-9.3)	4.3 (0.0-10.7)	4.3 (2.0-9.3)	0.32	0.60	0.32	0.96
Frustration	15.5 (5.0-23.3)	4.0 (0.0-13.0)	3.0 (0.0-9.0)	<0.01	0.03	0.01	0.79
TLX overall	58.8 (46.0-72.7)	41.0 (26.7-69.3)	41.0 (26.7-63.7)	0.03	0.12	0.04	0.97
(c)
	hinotori	da Vinci Xi without finger clutch	da Vinci Xi with finger clutch	P value (overall)	P value (hinotori vs da Vinci Xi without finger clutch)	P value (hinotori vs da Vinci Xi with finger clutch)	P value (da Vinci Xi without finger clutch vs da Vinci Xi wth finger clutch)
Mental demand	8.7 (0.0-26.7)	10.5 (0.0-30.0)	16.3 (0.0-26.7)	0.43	0.70	0.44	0.94
Physical demand	19.8 (3.7-26.7)	11.2 (0.0-23.3)	6.7 (0.0-12.0)	0.12	0.64	0.23	0.25
Temporal demand	0.0 (0.0-12.0)	0.0 (0.0-14.0)	1.7 (0.0-18.3)	0.27	0.51	0.30	0.86
Performance	10.3 (2.3-25.0)	7.7 (0.0-21.7)	8.2 (1.7-21.7)	0.52	0.74	0.50	1.00
Effort	14.0 (4.3-25.0)	14.5 (3.7-20.0)	7.8 (2.0-17.3)	0.18	0.90	0.27	0.30
Frustration	16.2 (9.3-33.3)	10.5 (3.0-25.0)	7.2 (0.0-20.0)	0.06	0.30	0.07	0.70
TLX overall	74.8 (65.0-90.7)	67.7 (39.3-77.3)	54.5 (35.0-72.0)	<0.01	0.15	0.01	0.28
TLX Task Load index
*Continuous variables are shown in "median (range)" form.
