# Supplementary material for: Comparison of the da Vinci Xi and hinotori surgical robotic systems using a training model: an ex vivo study
Source: Research Square preprint supplement (doi:10.21203/rs.3.rs-8313500/v1), 2025-12-15
Supplement: Supplementary file 2 [file 7cd19f02a1831bdf0731c054.xlsx]

## Sheet: Sheet1
Table 3. Comparison of NASA-Task Load index (TLX) of task 2 between hinotori and da Vinci in (a) overall participants, (b) attending surgeons and (c) residents.
(a)
	hinotori	da Vinci Xi without finger clutch	da Vinci Xi with finger clutch	P value (overall)	P value (hinotori vs da Vinci Xi without finger clutch)	P value (hinotori vs da Vinci Xi with finger clutch)	P value (da Vinci Xi without finger clutch vs da Vinci Xi wth finger clutch)
Mental demand	10.0 (0.0-24.0)	11.5 (0.0-24.0)	11.8 (0.0-28.3)	0.90	0.97	0.90	0.98
Physical demand	16.0 (0.0-28.3)	17.2 (1.0-30.0)	11.3 (0.0-28.3)	0.59	0.81	0.78	0.67
Temporal demand	1.7 (0.0-21.3)	4.2 (0.0-17.3)	1.5 (0.0-20.0)	0.89	0.85	0.99	0.97
Performance	7.5 (0.0-31.7)	4.7 (0.0-25.0)	7.7 (0.0-30.0)	0.60	0.87	0.93	0.56
Effort	11.7 (0.0-21.3)	10.7 (0.0-21.7)	13.0 (1.7-22.7)	0.62	0.74	1.00	0.63
Frustration	21.3 (4.7-31.7)	9.5 (0.0-26.7)	8.8 (2.3-21.7)	<0.01	<0.01	<0.01	0.99
TLX overall	69.7 (59.3-91.0)	63.7 (25.0-86.0)	62.2 (25.0-85.7)	0.05	0.09	0.09	0.98
(b)
	hinotori	da Vinci Xi without finger clutch	da Vinci Xi with finger clutch	P value (overall)	P value (hinotori vs da Vinci Xi without finger clutch)	P value (hinotori vs da Vinci Xi with finger clutch)	P value (da Vinci Xi without finger clutch vs da Vinci Xi wth finger clutch)
Mental demand	7.8 (0.0-24.0)	7.0 (0.0-24.0)	5.3 (0.0-22.7)	0.91	1.00	0.92	0.96
Physical demand	16.0 (0.0-23.3)	15.8 (1.0-30.0)	10.2 (0.0-28.3)	0.77	0.80	0.92	0.90
Temporal demand	8.2 (0.0-21.3)	6.7 (0.0-17.3)	4.7 (0.0-20.0)	0.85	0.98	0.88	0.92
Performance	7.7 (0.0-31.7)	4.8 (0.0-25.0)	7.0 (0.0-18.3)	0.64	0.64	0.97	0.85
Effort	9.3 (0.0-18.7)	5.2 (0.0-21.7)	9.0 (1.7-20.0)	0.76	0.99	0.80	0.85
Frustration	23.8 (4.7-31.7)	7.0 (0.0-21.3)	8.8 (3.3-21.7)	<0.01	0.02	0.04	0.70
TLX overall	71.5 (59.3-91.0)	60.2 (25.0-86.0)	55.8 (25.0-80.0)	0.05	0.23	0.06	0.80
(c)
	hinotori	da Vinci Xi without finger clutch	da Vinci Xi with finger clutch	P value (overall)	P value (hinotori vs da Vinci Xi without finger clutch)	P value (hinotori vs da Vinci Xi with finger clutch)	P value (da Vinci Xi without finger clutch vs da Vinci Xi wth finger clutch)
Mental demand	10.0 (0.0-21.7)	12.5 (0.0-20.0)	15.2 (0.0-28.3)	0.56	0.94	0.54	0.85
Physical demand	15.7 (3.0-28.3)	17.2 (2.7-28.3)	12.3 (2.7-23.3)	0.70	0.92	0.90	0.74
Temporal demand	0.0 (0.0-7.3)	0.0 (0.0-13.3)	0.0 (0.0-20.0)	0.76	0.83	0.83	0.99
Performance	5.8 (0.0-14.7)	4.5 (0.0-21.7)	8.3 (0.0-30.0)	0.68	0.98	0.77	0.77
Effort	17.2 (5.0-21.3)	12.5 (0.0-20.0)	15.3 (8.7-22.7)	0.29	0.35	0.80	0.57
Frustration	20.0 (17.0-31.7)	11.5 (2.7-26.7)	7.7 (2.3-20.0)	0.02	0.11	0.04	0.83
TLX overall	69.7 (60.3-86.3)	66.8 (43.0-76.0)	69.0 (54.3-85.7)	0.41	0.51	0.83	0.64
TLX Task Load index
*Continuous variables are shown in "median (range)" form.
