# Supplementary material for: Comparison of the da Vinci Xi and hinotori surgical robotic systems using a training model: an ex vivo study
Source: Research Square preprint supplement (doi:10.21203/rs.3.rs-8313500/v1), 2025-12-15
Supplement: Supplementary file 3 [file 9af2bbe1a41a3571731e810d.xlsx]

## Sheet: Sheet1
Table 1. Comparison of task completion times (sec) between hinotori and da Vinci in (a) overall participants, (b) attending surgeons and (c) residents.
(a)
	hinotori	da Vinci Xi without finger clutch	da Vinci Xi with finger clutch	P value (overall)	P value (hinotori vs da Vinci Xi without finger clutch)	P value (hinotori vs da Vinci Xi with finger clutch)	P value (da Vinci Xi without finger clutch vs da Vinci Xi wth finger clutch)
Task 1	313 (133-689)	222 (110-640)	217 (119-758)	0.07	0.13	0.11	1.00
Task 2	464 (247-1882)	349 (190-665)	392 (173-589)	0.06	0.06	0.18	0.98
Task 3	560 (235-1499)	364 (196-971)	490 (191-896)	0.16	0.13	0.39	0.98
(b)
	hinotori	da Vinci Xi without finger clutch	da Vinci Xi with finger clutch	P value (overall)	P value (hinotori vs da Vinci Xi without finger clutch)	P value (hinotori vs da Vinci Xi with finger clutch)	P value (da Vinci Xi without finger clutch vs da Vinci Xi wth finger clutch)
Task 1	203 (133-332)	155 (110-267)	159 (119-231)	0.22	0.38	0.28	0.99
Task 2	384 (247-569)	257 (190-467)	238 (173-492)	0.12	0.25	0.19	0.83
Task 3	499 (235-674)	337 (196-491)	299 (191-512)	0.14	0.15	0.33	0.99
(c)
	hinotori	da Vinci Xi without finger clutch	da Vinci Xi with finger clutch	P value (overall)	P value (hinotori vs da Vinci Xi without finger clutch)	P value (hinotori vs da Vinci Xi with finger clutch)	P value (da Vinci Xi without finger clutch vs da Vinci Xi wth finger clutch)
Task 1	360 (293-689)	256 (154-640)	254 (170-758)	0.04	0.12	0.07	0.98
Task 2	627 (419-1882)	415 (333-665)	488 (315-589)	0.07	0.06	0.33	0.67
Task 3	651 (424-1499)	567 (290-971)	599 (268-896)	0.53	0.51	0.83	0.96
*Continuous variables are shown in "median (range)" form.
