# Supplementary material for: Comparison of the da Vinci Xi and hinotori surgical robotic systems using a training model: an ex vivo study
Source: Research Square preprint supplement (doi:10.21203/rs.3.rs-8313500/v1), 2025-12-15
Supplement: Supplementary file 4 [file c71131fafa815d641a8d9a2b.xlsx]

## Sheet: Sheet1
Table 4. Comparison of NASA-Task Load index (TLX) of task 3 between hinotori and da Vinci in (a) overall participants, (b) attending surgeons and (c) residents.
(a)
	hinotori	da Vinci Xi without finger clutch	da Vinci Xi with finger clutch	P value (overall)	P value (hinotori vs da Vinci Xi without finger clutch)	P value (hinotori vs da Vinci Xi with finger clutch)	P value (da Vinci Xi without finger clutch vs da Vinci Xi wth finger clutch)
Mental demand	9.7 (0.0-31.7)	10.3 (0.0-30.0)	12.0 (0.0-31.7)	0.94	0.99	0.96	0.95
Physical demand	13.0 (0.0-26.7)	14.8 (0.0-26.7)	10.2 (1.0-26.7)	0.95	0.98	0.95	0.99
Temporal demand	4.7 (0.0-20.0)	5.5 (0.0-24.0)	1.0 (0.0-23.3)	0.19	0.95	0.21	0.33
Performance	7.8 (0.0-26.7)	5.8 (0.0-24.0)	11.2 (0.0-23.3)	0.56	0.90	0.73	0.61
Effort	10.7 (0.0-26.7)	13.0 (0.0-23.3)	11.8 (3.0-18.0)	0.82	0.90	0.89	0.90
Frustration	20.0 (3.3-31.7)	11.5 (2.0-28.3)	9.5 (0.0-25.0)	<0.01	<0.01	<0.01	0.70
TLX overall	73.7 (51.7-86.7)	60.0 (37.0-91.3)	59.8 (39.3-89.0)	0.04	0.19	0.03	0.88
(b)
	hinotori	da Vinci Xi without finger clutch	da Vinci Xi with finger clutch	P value (overall)	P value (hinotori vs da Vinci Xi without finger clutch)	P value (hinotori vs da Vinci Xi with finger clutch)	P value (da Vinci Xi without finger clutch vs da Vinci Xi wth finger clutch)
Mental demand	5.0 (0.0-31.7)	10.0 (0.0-30.0)	6.0 (0.0-17.3)	0.80	0.97	0.98	0.78
Physical demand	16.0 (1.7-23.3)	14.8 (1.3-26.7)	13.0 (1.0-26.7)	0.95	0.99	0.94	1.00
Temporal demand	7.8 (0.0-20.0)	10.0 (0.0-16.7)	4.0 (0.0-23.3)	0.54	0.94	0.60	0.70
Performance	6.7 (0.0-26.7)	7.5 (0.0-24.0)	7.3 (0.0-23.3)	0.99	1.00	1.00	1.00
Effort	8.3 (0.0-26.7)	7.0 (0.0-23.3)	6.7 (3.0-17.3)	0.89	0.85	0.99	0.99
Frustration	21.3 (3.3-31.7)	9.8 (2.0-16.0)	9.5 (3.3-15.0)	0.03	0.07	0.07	1.00
TLX overall	59.8 (51.7-86.7)	53.2 (45.7-91.3)	53.8 (39.2-72.3)	0.07	0.35	0.06	0.90
(c)
	hinotori	da Vinci Xi without finger clutch	da Vinci Xi with finger clutch	P value (overall)	P value (hinotori vs da Vinci Xi without finger clutch)	P value (hinotori vs da Vinci Xi with finger clutch)	P value (da Vinci Xi without finger clutch vs da Vinci Xi wth finger clutch)
Mental demand	9.7 (0.0-26.7)	10.3 (0.0-23.3)	13.0 (0.0-31.7)	0.52	0.99	0.77	0.50
Physical demand	5.3 (0.0-26.7)	11.7 (0.0-26.7)	7.7 (3.0-26.7)	0.83	0.94	0.83	1.00
Temporal demand	4.0 (0.0-12.0)	2.5 (0.0-24.0)	0.0 (0.0-9.0)	0.44	0.99	0.50	0.58
Performance	9.2 (0.0-22.7)	5.8 (0.0-18.3)	13.2 (2.0-22.7)	0.33	0.77	0.67	0.38
Effort	19.2 (0.0-25.0)	17.5 (5.0-21.3)	15.3 (5.7-18.0)	0.37	0.70	0.51	0.60
Frustration	20.0 (15.0-31.7)	15.0 (3.0-28.3)	7.8 (0.0-25.0)	0.05	0.11	0.13	0.70
TLX overall	76.8 (65.7-86.3)	69.5 (37.0-85.7)	62.5 (44.7-89.0)	0.26	0.38	0.35	1.00
TLX Task Load index
*Continuous variables are shown in "median (range)" form.
